# Supplementary material for: Combining paired analytical metabolomics and common garden trial to study the metabolism and gene variation of Ginkgo biloba L. cultivated varieties
Source: Royal Society of Chemistry journal article supplement (doi:10.1039/c7ra06229j), 2017-01-01
Supplement: c7ra06229j1.pdf [file c7ra06229j1.pdf]

Table S1 Name and place of grafted of the grafted strain.

| Samples                   | Place of grafted (Province) | Samples                           | Place of grafted (Province) |
|---------------------------|-----------------------------|-----------------------------------|-----------------------------|
| 1 Zhengan No. 1 (ZA-1)    | Guizhou                     | 16 Changrubaiguo (CRBG)           | Guizhou                     |
| 2 Zhengan No. 2 (ZA-2)    | Guizhou                     | 17 Panxianchangbaiguo (PXCBBG)    | Guizhou                     |
| 3 Zhengan No. 3 (ZA-3)    | Guizhou                     | 18 Tancheng 202 (TC202)           | Jiangsu                     |
| 4 Zhengan No. 4 (ZA-4)    | Guizhou                     | 19 Tiema No. 2 (TM-2)             | Jiangsu                     |
| 5 Dalongyan (DLY)         | Anhui                       | 20 Tiema No. 3 (TM-3)             | Jiangsu                     |
| 6 Yuanling No. 13 (YL-13) | Shandong                    | 21 Tiema No. 4 (TM-4)             | Jiangsu                     |
| 7 Xiaoyuanzi (XYZ)        | Jiangsu                     | 22 Damaling (DML)                 | Jiangsu                     |
| 8 Xinchun No. 9 (XC-9)    | Jiangsu                     | 23 Guilin No. 2 (GL-2)            | Guilin                      |
| 9 Dafozhi (DFZ)           | Jiangsu                     | 24 Guilin No. 6 (GL-2)            | Guilin                      |
| 10 Taixing No. 1(TX-1)    | Jiangsu                     | 25 Guilin No. 9 (GL-2)            | Guilin                      |
| 11 Taixing No. 3(TX-3)    | Jiangsu                     | 26 Tanchengmalin g No. 1 (TCML-1) | Jiangsu                     |
| 12 Taixing No. 4(TX-4)    | Jiangsu                     | 27 Tanchengmalin g No. 2 (TCML-1) | Jiangsu                     |
| 13 Sunongfoshou(SNFS)     | Jiangsu                     | 28 Taxi No. 1 (Taxi-1)            | Jiangsu                     |
| 14 Tancheng 231(TC231)    | Jiangsu                     | 29 Taxi No. 2 (Taxi-2)            | Jiangsu                     |
| 15 Dongtingfoshou(DTFS)   | Guilin                      | 30 Yaziyinxing (YZYX)             | Shandong                    |

Table S2 The regression equation, linear range and LOD, LOQ of each metabolite

|    | Metabolite       | Regression equation       | R <sup>2</sup> | Linear range (ng/mL) | LOD (ng/mL) | LOQ (ng/mL) |
|----|------------------|---------------------------|----------------|----------------------|-------------|-------------|
| 1  | EGC              | $y = 6.3207 x - 0.0287$   | 0.9996         | 2.00-500.00          | 0.075       | 0.250       |
| 2  | HA               | $y = 4.235 x + 0.0319$    | 0.9981         | 16.00-500.00         | 5.000       | 16.000      |
| 3  | Chlorogenic acid | $y = 34.7468 x - 0.2621$  | 1.0000         | 0.57-2840.00         | 0.003       | 0.010       |
| 4  | Catechin         | $y = 3.1658 x + 0.079$    | 0.9996         | 5.00-400.00          | 1.600       | 5.000       |
| 5  | CA               | $y = 3.7227 x + 0.0192$   | 0.9995         | 1.62-1620.00         | 0.002       | 0.008       |
| 6  | Procyanidin B2   | $y = 4.2448 x + 0.0045$   | 0.9993         | 1.94-5820.00         | 0.030       | 0.100       |
| 7  | EpiCatechin      | $y = 4.1748 x + 0.0243$   | 0.9982         | 3.00-1800.00         | 1.000       | 3.000       |
| 8  | Dmyri            | $y = 11.2477x - 0.01961$  | 0.9934         | 2.00-10000.00        | 0.050       | 0.250       |
| 9  | p-coum           | $y = 16.0888 x + 0.204$   | 0.9998         | 2.00-2000.00         | 0.020       | 0.060       |
| 10 | Clitorin         | $y = 16.8425 x + 0.0273$  | 0.9999         | 1.44-4320.00         | 0.002       | 0.008       |
| 11 | Rutin            | $y = 8.0259 x + 0.0643$   | 0.9999         | 1.54-6200.00         | 0.009       | 0.030       |
| 12 | Dquer            | $y = 19.4451 + 0.02602$   | 0.9932         | 2-10000.00           | 0.500       | 2.000       |
| 13 | Quer-3-G         | $y = 20.2226 x + 0.0452$  | 0.9998         | 1.96-880.00          | 0.016       | 0.050       |
| 14 | QGR              | $y = 13.5374 x - 0.0072$  | 0.9997         | 1.86-5580.00         | 0.043       | 0.143       |
| 15 | Kaem-3-RU        | $y = 13.7177 x + 0.0443$  | 0.9992         | 1.40-1400.00         | 0.001       | 0.002       |
| 16 | Isor-3-RU        | $y = 11.0941 x + 0.0299$  | 0.9998         | 1.80-5400.00         | 0.023       | 0.077       |
| 17 | Quer-3-R         | $y = 13.8554 x + 0.0799$  | 0.9980         | 1.98-1980.00         | 0.050       | 0.165       |
| 18 | Isor-3-G         | $y = 14.0290 x + 0.0688$  | 0.9981         | 1.24-1240.00         | 0.002       | 0.006       |
| 19 | Kaem-7-G         | $y = 17.2983 x + 0.0408$  | 0.9995         | 1.72.00-430.00       | 0.010       | 0.030       |
| 20 | Apig-7-G         | $y = 22.7991 x + 0.1241$  | 0.9990         | 1.68-1680.00         | 0.003       | 0.012       |
| 21 | Dkaem            | $y = 16.3512 + 0.01103$   | 0.9928         | 2.00-10000.00        | 0.020       | 0.080       |
| 22 | Myri             | $y = 16.871 x - 0.2203$   | 0.9984         | 1.90-1900.00         | 0.200       | 0.667       |
| 23 | QRCG             | $y = 11.1571 x + 0.1899$  | 0.9997         | 4.40-5280.00         | 0.004       | 0.012       |
| 24 | KRCG             | $y = 17.3968 x + 0.0474$  | 0.9997         | 1.74-435.00          | 0.008       | 0.025       |
| 25 | Luteolin         | $y = 11.4993 x + 0.0821$  | 0.9997         | 2.90-1160.00         | 0.002       | 0.008       |
| 26 | Quer             | $y = 15.7157 x - 0.02229$ | 0.9999         | 2.00-500.00          | 0.010       | 0.034       |
| 27 | Apig             | $y = 12.7079 x + 0.1799$  | 0.9998         | 1.62-1620.00         | 0.009       | 0.030       |
| 28 | Nari             | $y = 20.2863 + 0.13338$   | 0.9932         | 2.00-10000.00        | 0.100       | 0.200       |
| 29 | Kaem             | $y = 2.5753x + 0.0047$    | 0.9999         | 2.00-2000.00         | 0.003       | 0.010       |
| 30 | Syri             | $y = 30.5762 x + 0.3284$  | 0.9995         | 1.48-1480.00         | 0.005       | 0.018       |
| 31 | Isor             | $y = 20.7547 x + 0.1263$  | 0.9998         | 1.26-1260.00         | 0.001       | 0.003       |
| 32 | Amentoflavone    | $y = 53.0933 x + 0.0520$  | 0.9986         | 0.72-180.00          | 0.002       | 0.006       |
| 33 | Bilobetin        | $y = 2.4704 x + 0.0004$   | 0.9992         | 0.20-255.00          | 0.030       | 0.100       |
| 34 | Isoginkgetin     | $y = 29.3758 x + 0.0691$  | 0.9997         | 0.19-235.00          | 0.000       | 0.001       |
| 35 | Ginkgetin        | $y = 2.4415 x + 0.0086$   | 0.9999         | 0.17-210.00          | 0.003       | 0.009       |
| 36 | Sciadopitysin    | $y = 35.3566 x + 0.0998$  | 0.9996         | 0.22-275.00          | 0.005       | 0.017       |

Table S3 The method validation of each metabolite

| Metabolite | Precision (RSD,%)     |        |                |       |        | Repeatability<br>(RSD,%, n=6) | Stability<br>(RSD,%, n=6) | Original amount | Spiked amount | Recovery<br>(%, n= 3) | RSD (%) |      |
|------------|-----------------------|--------|----------------|-------|--------|-------------------------------|---------------------------|-----------------|---------------|-----------------------|---------|------|
|            | Intraday(n= 6)        |        | Interday(n= 6) |       |        |                               |                           |                 |               |                       |         |      |
|            | C( $\mu\text{g/mL}$ ) | RE     | RSD            | RE    | RSD    |                               |                           |                 |               |                       |         |      |
| 1          | EGC                   | 0.0560 | 6.45           | 5.20  | -5.69  | 10.31                         | 7.07                      | 5.34            | 0.0055        | 0.0055                | 101.78  | 3.26 |
|            |                       | 0.1120 | 10.22          | 0.42  | 10.71  | 2.40                          |                           |                 |               |                       |         |      |
|            |                       | 0.5600 | -2.60          | 3.66  | 2.37   | 9.62                          |                           |                 |               |                       |         |      |
| 2          | HA                    | 0.0400 | 1.36           | 10.30 | 3.12   | 7.21                          | 5.60                      | 7.55            | 0.0120        | 0.0120                | 97.30   | 4.71 |
|            |                       | 0.1600 | 2.22           | 10.31 | 6.64   | 8.13                          |                           |                 |               |                       |         |      |
|            |                       | 0.8000 | -5.08          | 2.74  | -5.35  | 4.76                          |                           |                 |               |                       |         |      |
| 3          | Chlorogenic acid      | 0.0440 | -12.28         | 0.54  | -14.90 | 3.32                          | 8.38                      | 13.42           | 0.0022        | 0.0022                | 85.15   | 1.37 |
|            |                       | 0.0880 | 0.58           | 1.13  | -5.54  | 5.99                          |                           |                 |               |                       |         |      |
|            |                       | 0.8800 | -7.58          | 1.93  | -7.35  | 2.29                          |                           |                 |               |                       |         |      |
| 4          | Catechin              | 0.0720 | 1.26           | 2.86  | -1.38  | 5.56                          | 4.59                      | 3.95            | 0.0249        | 0.0249                | 111.42  | 6.65 |
|            |                       | 0.1440 | 6.93           | 4.70  | 10.16  | 4.08                          |                           |                 |               |                       |         |      |
|            |                       | 0.7200 | 1.73           | 4.24  | 2.89   | 3.75                          |                           |                 |               |                       |         |      |
| 5          | CA                    | 0.0405 | 6.95           | 2.21  | 2.74   | 4.10                          | 7.68                      | 4.83            | 0.0036        | 0.0036                | 106.05  | 1.78 |
|            |                       | 0.1620 | 6.40           | 3.97  | 8.67   | 2.79                          |                           |                 |               |                       |         |      |
|            |                       | 0.8100 | -5.54          | 3.18  | -3.15  | 5.68                          |                           |                 |               |                       |         |      |
| 6          | Procyanidin B2        | 0.0485 | 11.27          | 1.40  | 4.00   | 5.90                          | 7.00                      | 6.93            | 0.0028        | 0.0028                | 109.39  | 2.13 |
|            |                       | 0.0970 | -0.57          | 3.12  | -10.44 | 9.78                          |                           |                 |               |                       |         |      |
|            |                       | 0.9700 | -7.93          | 2.86  | -7.31  | 2.04                          |                           |                 |               |                       |         |      |
| 7          | EpiCatechin           | 0.0450 | -0.16          | 5.43  | -1.81  | 3.73                          | 4.35                      | 2.80            | 0.0062        | 0.0062                | 104.72  | 2.80 |
|            |                       | 0.0900 | 11.57          | 3.45  | 12.12  | 2.84                          |                           |                 |               |                       |         |      |
|            |                       | 0.9000 | -4.06          | 1.35  | -0.74  | 3.48                          |                           |                 |               |                       |         |      |

(Continued)

|    | Compound | Precision (RSD,%) |        |                |        |       | Repeatability<br>(RSD,%, n=<br>6) | Stability<br>(RSD,%,<br>n= 6) | Original<br>amount | Spiked<br>amount | Recovery<br>(%, n= 3) | RSD<br>(%) |
|----|----------|-------------------|--------|----------------|--------|-------|-----------------------------------|-------------------------------|--------------------|------------------|-----------------------|------------|
|    |          | Intraday(n= 6)    |        | Interday(n= 6) |        |       |                                   |                               |                    |                  |                       |            |
|    |          | C( µg/mL)         | RE     | RSD            | RE     | RSD   |                                   |                               |                    |                  |                       |            |
| 8  | Dmyri    | 0.0200            | 13.49  | 2.96           | 12.54  | 2.60  | 3.52                              | 1.76                          | 0.0005             | 0.0004           | 108.41                | 1.20       |
|    |          | 0.2000            | 9.10   | 4.12           | 11.30  | 4.12  |                                   |                               |                    | 0.0005           | 114.04                | 2.23       |
|    |          | 2.0000            | 0.63   | 1.53           | 3.92   | 8.06  |                                   |                               |                    | 0.0007           | 103.38                | 1.86       |
| 9  | p-Coum   | 0.0360            | 13.47  | 1.86           | -10.37 | 5.07  | 5.71                              | 6.34                          | 0.0099             | 0.0079           | 105.58                | 2.77       |
|    |          | 0.1440            | 10.37  | 5.80           | 12.89  | 3.91  |                                   |                               |                    | 0.0099           | 93.90                 | 1.80       |
|    |          | 0.7200            | 1.24   | 1.07           | 2.53   | 3.30  |                                   |                               |                    | 0.0119           | 108.88                | 6.69       |
| 10 | Clitorin | 0.0360            | 0.19   | 4.36           | -2.86  | 4.06  | 5.65                              | 1.60                          | 0.2110             | 0.1690           | 104.49                | 1.62       |
|    |          | 0.1440            | -4.85  | 6.73           | -2.26  | 4.18  |                                   |                               |                    | 0.2110           | 103.99                | 3.41       |
|    |          | 0.7200            | 2.67   | 0.97           | -5.19  | 6.39  |                                   |                               |                    | 0.2530           | 108.4                 | 2.90       |
| 11 | Rutin    | 0.0770            | 3.03   | 2.30           | -2.04  | 4.82  | 6.32                              | 4.01                          | 0.2710             | 0.2170           | 100.78                | 3.55       |
|    |          | 0.1540            | -4.90  | 7.67           | -3.48  | 4.19  |                                   |                               |                    | 0.2710           | 103.16                | 4.26       |
|    |          | 0.7700            | -12.55 | 2.15           | -12.08 | 2.53  |                                   |                               |                    | 0.3250           | 99.71                 | 4.56       |
| 12 | Dquer    | 0.0200            | 12.06  | 2.64           | 9.37   | 3.71  | 2.73                              | 3.42                          | 0.0032             | 0.0026           | 87.83                 | 1.88       |
|    |          | 0.2000            | 13.54  | 2.81           | 12.92  | 1.33  |                                   |                               |                    | 0.0033           | 94.59                 | 3.82       |
|    |          | 2.0000            | 1.57   | 0.95           | 3.97   | 5.40  |                                   |                               |                    | 0.0039           | 89.57                 | 1.85       |
| 13 | Quer-3-G | 0.0490            | -0.83  | 2.66           | -3.44  | -2.73 | 4.00                              | 4.30                          | 0.0374             | 0.0299           | 93.49                 | 2.86       |
|    |          | 0.1960            | -2.12  | 7.13           | 0.21   | 4.12  |                                   |                               |                    | 0.0374           | 90.11                 | 0.87       |
|    |          | 0.9800            | -10.84 | 2.51           | -10.36 | 2.16  |                                   |                               |                    | 0.0449           | 102.64                | 2.06       |
| 14 | QGR      | 0.0465            | 1.58   | 5.34           | -2.68  | 4.81  | 5.51                              | 8.12                          | 0.0800             | 0.0640           | 105.23                | 2.95       |
|    |          | 0.1860            | -1.28  | 4.70           | -3.51  | 3.89  |                                   |                               |                    | 0.0800           | 108.66                | 3.40       |
|    |          | 0.9300            | -11.16 | 3.01           | -9.83  | 2.91  |                                   |                               |                    | 0.0960           | 102.80                | 1.62       |

(Continued)

|    | Metabolite | Precision (RSD,%) |        |                |        |      | Repeatability<br>(RSD,%, n=<br>6) | Stability<br>(RSD,%, n=<br>6) | Original amount | Spiked<br>amount | Recovery<br>(%, n= 3) | RSD (%) |
|----|------------|-------------------|--------|----------------|--------|------|-----------------------------------|-------------------------------|-----------------|------------------|-----------------------|---------|
|    |            | Intraday(n= 6)    |        | Interday(n= 6) |        |      |                                   |                               |                 |                  |                       |         |
|    |            | C( µg/mL)         | RE     | RSD            | RE     | RSD  |                                   |                               |                 |                  |                       |         |
| 15 | Kaem-3-RU  | 0.0350            | 1.13   | 4.35           | -3.42  | 5.40 | 3.89                              | 4.49                          | 0.3700          | 0.2960           | 106.35                | 1.26    |
|    |            | 0.1400            | 2.65   | 1.99           | 2.20   | 1.81 |                                   |                               |                 | 0.3700           | 99.14                 | 1.42    |
|    |            | 0.7000            | -7.20  | 1.86           | -5.68  | 3.18 |                                   |                               |                 | 0.4440           | 110.14                | 1.55    |
| 16 | Isor-3-RU  | 0.0450            | 1.15   | 3.86           | -4.07  | 5.41 | 4.39                              | 4.46                          | 0.2140          | 0.1700           | 91.16                 | 3.61    |
|    |            | 0.1800            | -0.52  | 1.92           | -1.19  | 2.27 |                                   |                               |                 | 0.2140           | 104.29                | 4.05    |
|    |            | 0.9000            | -9.86  | 0.99           | -8.57  | 3.02 |                                   |                               |                 | 0.2570           | 110.37                | 1.87    |
| 17 | Quer-3-R   | 0.0495            | -2.52  | 0.28           | -5.54  | 3.05 | 5.52                              | 9.26                          | 0.0130          | 0.0104           | 96.54                 | 3.83    |
|    |            | 0.0990            | 8.83   | 2.25           | 6.97   | 3.2  |                                   |                               |                 | 0.0130           | 114.81                | 0.74    |
|    |            | 0.9900            | -9.84  | 2.38           | -8.34  | 4.33 |                                   |                               |                 | 0.0156           | 97.74                 | 3.23    |
| 18 | Isor-3-G   | 0.0310            | -10.16 | 2.54           | -9.67  | 3.46 | 4.41                              | 5.00                          | 0.0136          | 0.0109           | 106.23                | 2.15    |
|    |            | 0.0620            | 5.56   | 2.66           | 4.10   | 3.14 |                                   |                               |                 | 0.0136           | 100.85                | 4.86    |
|    |            | 0.6200            | -13.92 | 2.29           | -13.22 | 1.92 |                                   |                               |                 | 0.0163           | 109.28                | 2.63    |
| 19 | Kaem-3-G   | 0.0430            | -5.16  | 2.99           | -6.59  | 2.36 | 8.78                              | 5.52                          | 0.0054          | 0.0043           | 97.81                 | 3.88    |
|    |            | 0.0860            | 3.49   | 2.87           | -0.25  | 4.50 |                                   |                               |                 | 0.0054           | 93.04                 | 7.61    |
|    |            | 0.1720            | 0.61   | 1.50           | -4.91  | 5.14 |                                   |                               |                 | 0.0065           | 100.68                | 2.94    |
| 20 | Apig-3-G   | 0.0420            | 2.81   | 1.56           | 1.71   | 4.74 | 3.97                              | 7.92                          | 0.0323          | 0.0260           | 113.52                | 1.69    |
|    |            | 0.0840            | 13.16  | 1.35           | 11.03  | 3.58 |                                   |                               |                 | 0.0320           | 106.53                | 4.45    |
|    |            | 0.8400            | -12.56 | 2.82           | -9.89  | 3.68 |                                   |                               |                 | 0.0380           | 93.14                 | 2.17    |
| 21 | Dkaem      | 0.0200            | 10.24  | 0.75           | 9.73   | 3.55 | 2.13                              | 4.63                          | 0.0168          | 0.0134           | 94.67                 | 1.53    |
|    |            | 0.2000            | 9.67   | 2.86           | 11.60  | 2.04 |                                   |                               |                 | 0.0168           | 106.22                | 2.77    |
|    |            | 2.0000            | -3.78  | 0.52           | -4.16  | 2.96 |                                   |                               |                 | 0.0200           | 96.26                 | 1.57    |

(Continued)

| Compound | Precision (RSD,%) |        |               |      |        | Repeatability<br>(RSD,%, n=6) | Stability<br>(RSD,%, n=6) | Original<br>amount | Spiked<br>amount | Recovery<br>(%, n=3) | RSD<br>(%) |      |
|----------|-------------------|--------|---------------|------|--------|-------------------------------|---------------------------|--------------------|------------------|----------------------|------------|------|
|          | Intraday(n=6)     |        | Interday(n=6) |      |        |                               |                           |                    |                  |                      |            |      |
|          | C( µg/mL)         | RE     | RSD           | RE   | RSD    |                               |                           |                    |                  |                      |            |      |
| 22       | Myri              | 0.0540 | -12.94        | 2.57 | -7.24  | 11.03                         |                           |                    | 0.0030           | 100.64               | 2.98       |      |
|          |                   | 0.1080 | -4.22         | 2.36 | 5.20   | 8.42                          | 6.73                      | 9.22               | 0.0038           | 0.0038               | 105.26     | 1.06 |
|          |                   | 1.0800 | -2.02         | 1.64 | -6.94  | 4.55                          |                           |                    | 0.0045           | 108.68               | 3.82       |      |
| 23       | QRCG              | 0.0880 | -7.81         | 2.52 | -10.62 | 3.72                          |                           |                    | 0.1570           | 91.67                | 5.43       |      |
|          |                   | 0.1760 | 6.50          | 1.29 | -8.51  | 2.51                          | 6.31                      | 4.44               | 0.1960           | 0.1960               | 101.93     | 0.99 |
|          |                   | 0.8800 | -11.61        | 1.87 | -13.18 | 2.12                          |                           |                    | 0.2350           | 100.26               | 1.42       |      |
| 24       | KRCG              | 0.0430 | -5.34         | 2.86 | -6.65  | 2.28                          |                           |                    | 0.1080           | 91.16                | 3.61       |      |
|          |                   | 0.0860 | 3.61          | 1.77 | -0.21  | 4.38                          | 6.53                      | 2.41               | 0.1730           | 0.1730               | 95.77      | 2.97 |
|          |                   | 0.1720 | -4.98         | 1.01 | -6.78  | 3.07                          |                           |                    | 0.2080           | 94.12                | 2.25       |      |
| 25       | Lute              | 0.0290 | 3.58          | 2.19 | 1.04   | 11.73                         |                           |                    | 0.0017           | 97.32                | 0.44       |      |
|          |                   | 0.0580 | 13.38         | 0.87 | 11.96  | 3.20                          | 8.68                      | 10.6               | 0.0022           | 0.0022               | 92.14      | 4.70 |
|          |                   | 0.5800 | -10.07        | 2.94 | -5.08  | 5.50                          |                           |                    | 0.0026           | 108.91               | 1.48       |      |
| 26       | Quer              | 0.0335 | -1.02         | 2.25 | -7.41  | 11.27                         |                           |                    | 0.0080           | 104.73               | 0.44       |      |
|          |                   | 0.0670 | 11.65         | 1.35 | 8.94   | 5.14                          | 7.46                      | 7.77               | 0.0100           | 0.0100               | 113.49     | 3.79 |
|          |                   | 0.6700 | -9.63         | 2.65 | -8.53  | 4.28                          |                           |                    | 0.0120           | 85.77                | 6.35       |      |
| 27       | Apig              | 0.0405 | -6.22         | 2.85 | -4.74  | 10.50                         |                           |                    | 0.0052           | 97.44                | 1.10       |      |
|          |                   | 0.0810 | -10.57        | 1.32 | 7.79   | 6.91                          | 4.50                      | 8.27               | 0.0065           | 0.0065               | 111.10     | 4.43 |
|          |                   | 0.8100 | -13.44        | 2.57 | -11.16 | 3.68                          |                           |                    | 0.0078           | 114.69               | 4.35       |      |
| 28       | Nari              | 0.0200 | -0.35         | 5.91 | -1.65  | 6.68                          |                           |                    | 0.0025           | 103.59               | 0.52       |      |
|          |                   | 0.2000 | 13.64         | 5.77 | 13.87  | 3.03                          | 2.42                      | 2.89               | 0.0032           | 0.0032               | 113.63     | 2.21 |
|          |                   | 2.0000 | 2.45          | 0.85 | 4.57   | 4.89                          |                           |                    | 0.0038           | 102.08               | 0.58       |      |

(Continued)

|    | Metabolite    | Precision (RSD,%) |        |                |        |       | Repeatability<br>(RSD,%, n=6) | Stability<br>(RSD,%, n=6) | Original amount | Spiked amount | Recovery<br>(%, n= 3) | RSD (%) |
|----|---------------|-------------------|--------|----------------|--------|-------|-------------------------------|---------------------------|-----------------|---------------|-----------------------|---------|
|    |               | Intraday(n= 6)    |        | Interday(n= 6) |        |       |                               |                           |                 |               |                       |         |
|    |               | C( µg/mL)         | RE     | RSD            | RE     | RSD   |                               |                           |                 |               |                       |         |
| 29 | Kaem          | 0.0450            | -3.48  | 4.58           | -0.08  | 3.96  | 8.42                          | 6.94                      | 0.0075          | 0.0060        | 101.68                | 1.76    |
|    |               | 0.0900            | 12.59  | 0.65           | 14.50  | 3.42  |                               |                           |                 | 0.0075        | 109.97                | 5.79    |
|    |               | 0.9000            | -12.83 | 2.02           | -6.77  | 5.16  |                               |                           |                 | 0.0090        | 88.73                 | 2.42    |
| 30 | Syri          | 0.0370            | -4.03  | 2.44           | -6.38  | 3.13  | 7.06                          | 8.00                      | 0.0003          | 0.0002        | 102.28                | 3.79    |
|    |               | 0.0740            | 13.57  | 0.34           | 7.01   | 8.69  |                               |                           |                 | 0.0003        | 98.06                 | 5.67    |
|    |               | 0.7400            | -14.01 | 1.90           | -13.1  | 1.60  |                               |                           |                 | 0.0003        | 110.42                | 5.19    |
| 31 | Isor          | 0.0315            | -1.85  | 1.74           | -4.48  | 12.79 | 4.72                          | 7.22                      | 0.0057          | 0.0046        | 86.79                 | 1.58    |
|    |               | 0.0630            | 7.88   | 2.74           | 5.29   | 8.74  |                               |                           |                 | 0.0057        | 98.86                 | 5.13    |
|    |               | 0.6300            | -13.21 | 2.58           | -12.67 | 1.77  |                               |                           |                 | 0.0068        | 105.43                | 1.70    |
| 32 | Amentoflavone | 0.0180            | -3.37  | 3.08           | 1.93   | 4.88  | 8.35                          | 7.10                      | 0.0054          | 0.0043        | 85.68                 | 0.77    |
|    |               | 0.0360            | 2.17   | 4.40           | 1.92   | 5.09  |                               |                           |                 | 0.0054        | 88.89                 | 2.77    |
|    |               | 0.0720            | -1.73  | 3.44           | 0.11   | 5.04  |                               |                           |                 | 0.0065        | 110.26                | 5.88    |
| 33 | Bilobetin     | 0.0255            | -7.15  | 2.51           | -9.98  | 8.23  | 8.48                          | 7.31                      | 0.1420          | 0.1140        | 90.04                 | 5.47    |
|    |               | 0.0510            | -12.67 | 2.30           | -14.23 | 2.53  |                               |                           |                 | 0.1420        | 113.38                | 1.99    |
|    |               | 0.1020            | -9.67  | 2.51           | -10.65 | 3.18  |                               |                           |                 | 0.1700        | 110.42                | 3.12    |
| 34 | Isoginkgetin  | 0.0235            | -4.20  | 1.69           | -0.78  | 3.47  | 8.43                          | 6.32                      | 0.3650          | 0.2920        | 97.57                 | 1.30    |
|    |               | 0.0470            | -7.41  | 0.79           | -6.47  | 1.88  |                               |                           |                 | 0.3650        | 86.26                 | 1.60    |
|    |               | 0.0940            | -13.70 | 4.56           | -12.89 | 3.10  |                               |                           |                 | 0.4380        | 86.65                 | 3.34    |
| 35 | Ginkgetin     | 0.0340            | -7.66  | 1.84           | -3.84  | 5.79  | 6.81                          | 5.59                      | 0.3040          | 0.2430        | 92.70                 | 6.07    |
|    |               | 0.0680            | -9.34  | 3.64           | 2.45   | 10.71 |                               |                           |                 | 0.3040        | 105.30                | 4.61    |
|    |               | 0.1360            | -13.97 | 4.97           | -9.96  | 7.42  |                               |                           |                 | 0.3650        | 100.88                | 3.76    |

(Continued)

| Metabolite | Precision (RSD,%) |       |                |        |       | Repeatability<br>(RSD,%, n=6) | Stability<br>(RSD,%, n=6) | Original amount | Spiked amount | Recovery<br>(%, n= 3) | RSD (%) |
|------------|-------------------|-------|----------------|--------|-------|-------------------------------|---------------------------|-----------------|---------------|-----------------------|---------|
|            | Intraday(n= 6)    |       | Interday(n= 6) |        |       |                               |                           |                 |               |                       |         |
|            | C( µg/mL)         | RE    | RSD            | RE     | RSD   |                               |                           |                 |               |                       |         |
|            | 0.0275            | -9.92 | 2.67           | -5.60  | 13.77 |                               |                           |                 | 0.7500        | 107.02                | 1.50    |
| 36         | 0.0550            | -9.10 | 4.42           | -14.08 | 5.00  | 7.90                          | 5.91                      | 0.9480          | 0.9480        | 104.17                | 3.97    |
|            | 0.1100            | -2.28 | 2.36           | -6.98  | 4.49  |                               |                           |                 | 1.1380        | 94.43                 | 4.67    |



Table S4 Concentrations of flavonoid metabolites in 30 *Ginkgo* cultivate varieties (ng/g).

|                  | ZA-1         | ZA-2         | ZA-3        | ZA-4        | DLY         | YL-13       |
|------------------|--------------|--------------|-------------|-------------|-------------|-------------|
| EGC              | 26.49±0.74   | 19.16±0.17   | 36.69±0.56  | 26.82±0.85  | 19.53±0.37  | 8.17±0.09   |
| HA               | 34.03±0.16   | 30.48±2.08   | 99.91±7.87  | 45.24±3.15  | 16.7±0.67   | 104.96±3.17 |
| Chlorogenic acid | 0.70±0.01    | 0.70±0.00    | 0.74±0.01   | 0.83±0.01   | 0.76±0.00   | 0.69±0.00   |
| Catechin         | 150.58±3.86  | 194.6±1.24   | 349.86±5.57 | 308.73±3.24 | 187.26±3.29 | 118.36±2.6  |
| CA               | 8.02±0.24    | 7.67±0.16    | 6.04±0.12   | 24.16±0.39  | 8.88±0.18   | 1.45±0.07   |
| Procyanidin B2   | 15.37±0.50   | 14.95±0.42   | 7.57±0.29   | 8.14±0.41   | 10.45±0.50  | 3.60±0.03   |
| EpiCatechin      | 62.93±2.24   | 72.11±0.86   | 28.20±0.57  | 37.68±1.26  | 50.86±1.95  | 24.84±0.48  |
| Dmyri            | 5.76±0.16    | 3.78±0.06    | 3.88±0.17   | 16.56±0.52  | 0.87±0.01   | 0.81±0.03   |
| p-coum           | 8.24±0.27    | 5.44±0.08    | 10.72±0.24  | 10.47±0.19  | 4.67±0.06   | 9.6±0.13    |
| Clitorin         | 210.43±4.87  | 562.86±5.64  | 154.05±1.31 | 205.07±6.52 | 45.46±1.79  | 261.08±4.16 |
|                  |              |              |             | 1109.52±8.4 | 485.59±12.8 | 660.24±17.5 |
| Rutin            | 316.61±7.71  | 744.25±7.20  | 915.02±6.82 | 3           | 4           | 9           |
| Dquer            | 31.39±0.45   | 13.21±0.49   | 34.09±0.61  | 120.40±1.38 | 13.20±0.22  | 5.92±0.02   |
| Quer-3-G         | 37.60±0.91   | 60.43±0.76   | 86.80±1.63  | 79.72±2.09  | 82.43±3.16  | 71.24±1.49  |
| QGR              | 155.89±2.54  | 150.50±2.42  | 129.09±0.69 | 29.80±1.44  | 111.41±3.84 | 53.06±0.31  |
|                  |              |              |             | 449.49±16.9 |             | 763.07±20.7 |
| Kaem-3-RU        | 230.41±9.40  | 599.89±19.28 | 270.02±4.27 | 3           | 218.39±6.84 | 9           |
| Isor-3-RU        | 204.69±4.76  | 297.26±3.11  | 215.96±4.60 | 437.23±5.74 | 248.37±4.6  | 330.19±7.97 |
| Quer-3-R         | 51.56±0.83   | 34.30±0.29   | 57.94±1.42  | 8.19±0.33   | 55.11±1.67  | 15.79±0.39  |
| Isor-3-G         | 9.30±0.34    | 12.38±0.32   | 19.55±0.4   | 18.76±0.5   | 27.48±1.35  | 27.49±0.41  |
| Kaem-7-G         | 13.39±0.23   | 19.22±0.12   | 7.41±0.15   | 5.09±0.09   | 4.55±0.08   | 5.58±0.10   |
| Apig-7-G         | 68.75±1.46   | 129.11±1.55  | 73.32±0.69  | 78.38±2.14  | 54.63±1.25  | 53.73±1.06  |
| Dkaem            | 154.47±0.54  | 77.50±3.02   | 89.96±2.17  | 478.61±6.03 | 34.99±0.45  | 44.26±0.32  |
| Myri             | 3.96±0.09    | 1.87±0.01    | 4.58±0.11   | 13.18±0.30  | 2.05±0.01   | 1.52±0.02   |
| QRCG             | 233.89±4.70  | 236.46±1.79  | 257.75±4.40 | 89.05±1.16  | 176.4±5.47  | 125.15±2.16 |
|                  |              |              |             |             |             | 271.37±12.0 |
| KRCG             | 216.77±0.95  | 311.66±3.81  | 246.07±3.80 | 41.00±1.49  | 122.82±0.92 | 9           |
| Luteolin         | 29.88±0.76   | 11.18±0.15   | 16.89±0.51  | 59.45±0.92  | 15.68±0.25  | 2.92±0.12   |
| Quer             | 8.88±0.23    | 3.28±0.07    | 10.56±0.40  | 28.86±0.67  | 5.19±0.17   | 2.16±0.05   |
| Apig             | 22.08±0.32   | 11.91±0.05   | 17.36±0.47  | 84.18±1.74  | 8.58±0.29   | 6.05±0.11   |
| Nari             | 29.14±0.02   | 19.99±0.24   | 24.66±0.72  | 206.12±2.79 | 22.27±0.49  | 7.84±0.04   |
| Kaem             | 6.35±0.17    | 2.52±0.10    | 3.22±0.03   | 11.85±0.27  | 1.83±0.07   | 1.63±0.05   |
| Syri             | 0.39±0.00    | 0.06±0.00    | 0.25±0.01   | 0.74±0.03   | 0.39±0.03   | -           |
| Isor             | 4.33±0.11    | 1.42±0.02    | 4.70±0.15   | 16.61±0.23  | 5.25±0.24   | 1.65±0.04   |
| Amentoflavone    | 10.45±0.46   | 18.65±1.08   | 19.55±0.92  | 13.59±0.37  | 22.62±0.67  | 12.97±0.48  |
| Bilobetin        | 271.15±11.51 | 261.25±12.74 | 262.91±8.22 | 343.77±6.57 | 367.86±3.25 | 216.68±3.53 |
|                  |              |              | 385.44±10.9 |             |             |             |
| Isoginkgetin     | 747.13±5.32  | 731.11±14.37 | 7           | 465.08±1.77 | 304.54±3.98 | 547.77±5.47 |
| Ginkgetin        | 681.61±17.99 | 617.93±18.38 | 688.17±11.7 | 590.48±8.24 | 939.45±18.0 | 487.33±12.9 |

|               |              |              |             |             |             |             |
|---------------|--------------|--------------|-------------|-------------|-------------|-------------|
|               |              |              | 2           |             | 3           | 8           |
|               | 1541.42±29.7 | 1222.28±44.8 | 992.74±26.3 | 1067.33±16. | 783.29±21.8 |             |
| Sciadopitysin | 5            | 1            | 7           | 9           | 9           | 917.12±8.24 |

(Continued)

|                  | XYZ         | XC-9        | DFZ         | TX-1         | TX-3         | TX-4        |
|------------------|-------------|-------------|-------------|--------------|--------------|-------------|
| EGC              | 16.37±1.37  | 10.54±0.39  | 13.26±0.34  | 15.37±0.34   | 28.12±0.78   | 14.09±1.06  |
| HA               | 98.02±4.19  | 34.56±0.96  | 12.07±0.72  | 48.79±1.56   | 231.57±22.91 | 16.51±1.19  |
| Chlorogenic acid | 0.69±0.00   | 0.71±0.01   | 0.74±0.01   | 0.72±0.00    | 0.76±0.01    | 0.70±0.01   |
| Catechin         | 80.94±6.62  | 213.00±7.75 | 87.59±1.16  | 241.71±3.91  | 165.95±3.96  | 114.09±0.81 |
| CA               | 3.79±0.14   | 5.41±0.33   | 1.65±0.04   | 17.92±0.24   | 37.32±1.12   | 2.79±0.03   |
| Procyanidin B2   | 5.02±0.42   | 12.24±0.44  | 11.07±0.25  | 10.25±0.40   | 10.25±0.68   | 6.85±0.04   |
| EpiCatechin      | 25.21±1.01  | 46.02±0.86  | 36.61±0.19  | 40.25±1.89   | 36.58±0.43   | 32.78±0.05  |
| Dmyri            | 2.34±0.02   | 1.05±0.02   | 0.77±0.03   | 2.85±0.05    | 4.22±0.30    | 1.67±0.02   |
| p-coum           | 8.20±0.66   | 6.35±0.31   | 4.48±0.16   | 10.58±0.28   | 48.92±1.28   | 3.95±0.21   |
| Clitorin         | 222.94±5.13 | 357.67±4.6  | 142.7±1.66  | 138.35±2.82  | 678.73±28.26 | 158.21±2.83 |
|                  | 303.38±15.4 | 1002.15±8.7 |             |              |              |             |
| Rutin            | 1           | 5           | 233.68±5.24 | 816.89±19.77 | 639.6±27.36  | 222.92±5.43 |
| Dquer            | 10.37±0.10  | 9.42±0.30   | 7.31±0.14   | 37.97±0.22   | 26.81±1.96   | 9.05±0.04   |
| Quer-3-G         | 22.81±0.72  | 107.08±1.23 | 28.33±0.52  | 88.28±2.20   | 92.59±1.41   | 30.94±0.45  |
| QGR              | 84.77±4.85  | 123.55±1.03 | 87.85±0.95  | 117.75±4.00  | 96.77±1.94   | 99.36±1.83  |
|                  |             | 694.01±23.8 |             |              | 1255.95±40.7 |             |
| Kaem-3-RU        | 320.75±7.31 | 7           | 198.87±4.80 | 545.35±10.04 | 3            | 269.58±6.17 |
|                  |             | 694.43±26.0 |             |              |              |             |
| Isor-3-RU        | 183.94±7.36 | 7           | 152.15±2.53 | 443.21±4.77  | 767.44±29.97 | 186.57±1.09 |
| Quer-3-R         | 22.52±1.78  | 43.00±0.46  | 24.91±0.04  | 48.01±0.90   | 27.04±0.3    | 26.70±0.42  |
| Isor-3-G         | 9.66±0.23   | 34.01±0.21  | 8.52±0.05   | 29.06±1.19   | 56.79±0.43   | 11.31±0.29  |
| Kaem-7-G         | 6.16±0.12   | 3.72±0.06   | 9.78±0.25   | 6.04±0.34    | 7.76±0.10    | 6.37±0.05   |
| Apig-7-G         | 35.98±2.34  | 48.55±0.56  | 71.34±0.64  | 76.97±1.57   | 61.19±0.78   | 44.28±0.27  |
| Dkaem            | 55.02±0.14  | 35.7±1.91   | 25.71±0.41  | 189.33±1.73  | 282.27±5.74  | 42.63±0.33  |
| Myri             | 1.54±0.03   | 2.13±0.05   | 1.45±0.01   | 9.8±0.29     | 10.1±0.04    | 1.64±0.01   |
| QRCG             | 129.00±9.84 | 232.35±4.87 | 163.12±2.84 | 207.46±5.51  | 191.39±0.88  | 143.68±1.54 |
| KRCG             | 186.76±7.37 | 243.97±4.20 | 145.98±2.27 | 273.61±3.33  | 436.51±15.59 | 171.06±3.33 |
| Luteolin         | 6.99±0.55   | 3.43±0.25   | 2.12±0.06   | 38.75±1.44   | 63.1±0.53    | 6.97±0.23   |
| Quer             | 1.62±0.11   | 4.94±0.31   | 1.02±0.01   | 24.03±0.22   | 27.3±0.10    | 2.79±0.11   |
| Apig             | 7.52±0.46   | 9.80±0.28   | 4.93±0.08   | 54.62±1.40   | 54.06±0.26   | 5.92±0.31   |
| Nari             | 9.05±0.04   | 8.89±0.50   | 10.14±0.17  | 43.21±0.26   | 50.95±0.51   | 12.15±0.08  |
| Kaem             | 1.54±0.15   | 2.92±0.23   | 0.42±0.02   | 13.78±0.38   | 34.76±0.26   | 1.65±0.03   |
| Syri             | 0.05±0.00   | 0.15±0.01   | -           | 1.87±0.06    | 2.72±0.04    | 0.24±0.00   |

|               |             |             |              |              |              |             |
|---------------|-------------|-------------|--------------|--------------|--------------|-------------|
| Isor          | 0.82±0.03   | 5.45±0.17   | -            | 20.88±0.84   | 41.14±0.14   | 2.21±0.07   |
| Amentoflavone | 5.27±0.43   | 10.7±0.41   | 12.47±0.28   | 38.27±1.96   | 42.88±3.11   | 13.59±0.82  |
|               |             | 226.77±14.7 |              |              |              | 280.78±15.8 |
| Bilobetin     | 187.32±2.19 | 3           | 319.02±10.43 | 632.99±7.33  | 661.27±27.96 | 8           |
|               |             | 530.81±13.7 |              |              |              |             |
| Isoginkgetin  | 499.8±3.33  | 8           | 610.09±16.19 | 600.11±19.58 | 909.15±28.46 | 652.09±3.70 |
|               |             | 400.35±17.4 |              | 1005.62±44.0 |              | 611.46±20.5 |
| Ginkgetin     | 400.00±8.91 | 4           | 556.90±14.3  | 2            | 835.45±41.87 | 6           |
|               | 988.78±24.2 | 732.73±50.8 | 1161.90±19.5 |              | 1380.5±122.6 | 1166.5±60.3 |
| Sciadopitysin | 8           | 7           | 9            | 898.21±36.16 | 2            | 3           |

(Continued)

|                  | SNFS         | TC231         | DTFS        | CRBG        | PXCBG        | TC202        |
|------------------|--------------|---------------|-------------|-------------|--------------|--------------|
| EGC              | 11.3±0.19    | 31.29±0.13    | 17.36±0.26  | 13.38±0.65  | 135.74±4.10  | 14.2±0.30    |
| HA               | 25.55±2.47   | 31.55±0.75    | 32.07±0.87  | 15.85±0.67  | 81.36±6.10   | 42.19±1.83   |
| Chlorogenic acid | 0.72±0.01    | 0.74±0.01     | 0.70±0.00   | 0.71±0.01   | 0.73±0.01    | 0.73±0.00    |
| Catechin         | 311.83±4.89  | 313.69±5.57   | 95.19±0.46  | 110.95±5.61 | 453.71±15.44 | 166.99±2.72  |
| CA               | 6.86±0.24    | 14.70±0.39    | 10.46±0.12  | 8.89±0.43   | 14.00±0.46   | 7.82±0.13    |
| Procyanidin B2   | 13.81±0.08   | 22.06±1.26    | 7.75±0.19   | 3.63±0.12   | 2.29±0.17    | 19.01±0.27   |
| EpiCatechin      | 64.05±1.63   | 64.18±1.02    | 33.14±0.43  | 23.85±0.78  | 9.28±0.00    | 67.01±0.70   |
| Dmyri            | 1.09±0.01    | 1.36±0.01     | 1.41±0.02   | 1.30±0.01   | 3.52±0.03    | 3.70±0.08    |
| p-coum           | 4.58±0.03    | 6.78±0.26     | 5.44±0.09   | 0.58±0.05   | 15.71±0.29   | 6.21±0.13    |
| Clitorin         | 130.85±0.58  | 217.41±3.36   | 182.61±1.80 | 195.13±2.91 | 288.01±1.29  | 108.75±0.48  |
|                  |              | 1795.34±26.5  |             | 603.59±28.8 |              |              |
| Rutin            | 5            | 1726.37±27.08 | 246.31±4.53 | 8           | 609.16±10.54 | 792.92±21.16 |
| Dquer            | 19.46±0.19   | 6.82±0.04     | 8.98±0.09   | 18.96±0.12  | 18.78±0.19   | 13.38±0.06   |
| Quer-3-G         | 171.5±0.88   | 148.64±1.22   | 28.5±0.55   | 103.11±2.81 | 79.04±0.51   | 47.62±0.24   |
| QGR              | 85.37±1.51   | 166.44±1.18   | 93.86±1.54  | 134.39±0.64 | 177.03±3.02  | 130.59±0.40  |
|                  |              |               |             | 365.69±11.5 |              |              |
| Kaem-3-RU        | 5            | 836.59±11.78  | 195.58±3.84 | 1           | 331.72±11.60 | 341.49±10.42 |
| Isor-3-RU        | 1178.49±7.17 | 1068.84±13.81 | 146.12±1.49 | 296.32±5.23 | 415.76±7.06  | 254.77±4.71  |
| Quer-3-R         | 19.59±0.11   | 55.35±1.04    | 25.89±0.35  | 41.68±1.52  | 70.51±0.80   | 43.97±0.13   |
| Isor-3-G         | 60.09±0.75   | 41.21±0.75    | 7.71±0.04   | 37.43±0.53  | 26.36±0.25   | 11.5±0.33    |
| Kaem-7-G         | 11.97±0.03   | 4.15±0.08     | 9.47±0.42   | 6.27±0.21   | 6.54±0.21    | 8.55±0.14    |
| Apig-7-G         | 306.55±8.80  | 89.36±1.60    | 59.39±0.34  | 54.23±1.33  | 49.42±0.94   | 70.92±0.20   |
| Dkaem            | 99.99±0.23   | 21.97±0.04    | 36.31±0.27  | 77.32±0.50  | 80.06±0.67   | 117.49±0.30  |
| Myri             | 3.65±0.04    | 3.54±0.01     | 1.62±0.02   | 3.84±0.11   | 6.79±0.13    | 5.09±0.03    |
| QRCG             | 170.57±1.31  | 296.55±1.45   | 155.37±1.17 | 228.52±3.22 | 341.44±4.26  | 253.05±3.07  |

|               |              |               |             |             |              |              |
|---------------|--------------|---------------|-------------|-------------|--------------|--------------|
|               |              |               |             | 224.85±18.8 |              |              |
| KRCG          | 256.6±2.00   | 349.08±6.79   | 163.14±3.60 | 2           | 233.60±5.00  | 226.08±2.45  |
| Luteolin      | 13.26±0.08   | 5.47±0.07     | 5.86±0.00   | 15.17±0.30  | 14.31±0.24   | 24.41±0.33   |
| Quer          | 11.14±0.11   | 12.57±0.14    | 2.05±0.01   | 7.48±0.15   | 15.22±0.20   | 11.88±0.28   |
| Apig          | 25.31±0.22   | 10.38±0.10    | 7.85±0.19   | 14.12±0.48  | 29.74±0.12   | 28.48±0.42   |
| Nari          | 27.33±0.18   | 13.64±0.05    | 13.99±0.25  | 14.77±0.05  | 18.19±0.15   | 32.1±0.13    |
| Kaem          | 5.43±0.11    | 4.01±0.13     | 1.49±0.05   | 2.79±0.10   | 6.61±0.12    | 5.99±0.15    |
| Syri          | 1.06±0.02    | 0.60±0.01     | 0.10±0.01   | 0.31±0.01   | 0.54±0.01    | 0.39±0.01    |
| Isor          | 12.27±0.05   | 9.71±0.22     | 0.84±0.01   | 5.35±0.12   | 12.79±0.17   | 6.19±0.17    |
| Amentoflavone | 52.48±0.20   | 25.31±0.46    | 10.99±0.09  | 18.61±0.48  | 19.49±1.86   | 14.53±0.31   |
|               |              |               |             | 410.54±26.3 |              |              |
| Bilobetin     | 807.97±10.39 | 579.39±12.13  | 218.24±2.87 | 6           | 468.23±21.07 | 302.83±3.39  |
|               |              |               | 504.76±12.6 | 598.73±40.8 |              |              |
| Isoginkgetin  | 662.69±7.74  | 785.25±8.98   | 6           | 2           | 629.13±23.60 | 619.87±14.51 |
|               | 1239.65±38.2 |               |             | 981.14±22.0 |              |              |
| Ginkgetin     | 9            | 742.96±28.66  | 422.05±6.87 | 1           | 848.2±15.90  | 535.37±13.03 |
|               |              | 1261.85±103.8 | 807.36±69.2 | 1325.58±5.5 | 1062.03±30.5 | 1058.59±25.0 |
| Sciadopitysin | 845.49±55.01 | 2             | 9           | 5           | 0            | 7            |

(Continued)

|                  | TM-2          | TM-3         | TM-4         | DML          | GL-2        | GL-6         |
|------------------|---------------|--------------|--------------|--------------|-------------|--------------|
| EGC              | 39.09±2.83    | 14.03±0.11   | 12.72±0.47   | 13.92±0.35   | 8.89±0.41   | 9.19±0.88    |
| HA               | 71.14±1.06    | 39.82±2.16   | 37.47±2.33   | 40.6±0.87    | 56.34±3.36  | 54.1±5.35    |
| Chlorogenic acid | 3.49±0.04     | 0.73±0.01    | 0.71±0.02    | 0.72±0.02    | 0.71±0.00   | 0.70±0.01    |
| Catechin         | 285.31±10.37  | 150.42±1.07  | 101.87±1.64  | 165.71±2.45  | 175.25±4.15 | 212.55±6.28  |
| CA               | 13.88±0.99    | 13.79±0.08   | 19.28±0.44   | 12.04±0.16   | 7.55±0.38   | 8.34±0.42    |
| Procyanidin B2   | 35.65±1.16    | 11.92±0.32   | 9.49±0.30    | 16.21±0.29   | 10.46±0.52  | 13.46±0.02   |
| EpiCatechin      | 84.08±1.99    | 48.28±0.39   | 41.54±0.35   | 54.21±0.58   | 64.25±2.37  | 73.92±0.40   |
| Dmyri            | 3.98±0.11     | 1.72±0.02    | 1.18±0.03    | 2.34±0.03    | 1.10±0.02   | 4.10±0.12    |
| p-coum           | 10.19±0.98    | 5.33±0.04    | 6.55±0.60    | 5.28±0.08    | 5.99±0.22   | 12.54±0.16   |
| Clitorin         | 233.95±4.96   | 130.89±0.73  | 221.36±5.33  | 148.21±0.62  | 299.2±7.77  | 314.58±2.85  |
|                  | 2278.79±120.3 |              |              |              |             |              |
| Rutin            | 1             | 964.6±21.91  | 661.69±38.61 | 654.94±11.37 | 613.00±7.33 | 595.54±16.22 |
| Dquer            | 17.09±0.08    | 9.62±0.20    | 13.70±0.12   | 12.74±0.13   | 16.06±0.02  | 40.20±0.46   |
| Quer-3-G         | 185.64±10.62  | 63.54±0.44   | 68.58±3.56   | 55.87±1.02   | 85.60±2.90  | 130.29±0.55  |
| QGR              | 170.35±3.11   | 99.06±0.60   | 137.6±3.73   | 135.09±2.05  | 154.11±5.82 | 244.1±1.29   |
|                  |               |              |              |              | 313.32±10.0 |              |
| Kaem-3-RU        | 1282.74±41.91 | 621.32±19.01 | 471.49±21.2  | 432.72±9.28  | 5           | 417.72±4.57  |

|               |              |                             |                              |                              |                            |                              |
|---------------|--------------|-----------------------------|------------------------------|------------------------------|----------------------------|------------------------------|
| Isor-3-RU     | 934.66±3.19  | 297.15±3.55                 | 462.47±19.55                 | 281.88±5.25                  | 294.48±7.04                | 498.82±9.99                  |
| Quer-3-R      | 38.47±1.11   | 33.9±0.13                   | 30.44±1.11                   | 40.35±0.64                   | 32.60±0.86                 | 85.72±1.07                   |
| Isor-3-G      | 73.26±3.66   | 18.66±0.65                  | 17.21±0.64                   | 15.71±0.46                   | 23.80±0.12                 | 42.83±0.44                   |
| Kaem-7-G      | 18.75±0.23   | 6.19±0.14                   | 5.99±0.22                    | 5.63±0.41                    | 10.58±0.23                 | 13.02±0.23                   |
| Apig-7-G      | 218.02±9.19  | 87.33±0.84                  | 89.67±2.01                   | 64.33±0.18                   | 69.93±1.26                 | 169.56±4.89                  |
| Dkaem         | 173.79±2.42  | 84.33±0.86                  | 56.27±0.67                   | 90.38±0.44                   | 65.52±0.56                 | 195.1±1.03                   |
| Myri          | 10.68±0.27   | 3.51±0.05                   | 3.24±0.10                    | 3.89±0.02                    | 2.89±0.09                  | 7.47±0.14                    |
| QRCG          | 379.03±4.36  | 188.00±3.10                 | 189.24±5.93                  | 239.33±3.1                   | 202.11±3.7                 | 348.57±2.33                  |
| KRCG          | 210.6±3.14   | 251.57±2.97                 | 369.06±8.66                  | 199.64±5.77                  | 201.70±2.33                | 275.36±3.57                  |
| Luteolin      | 26.12±1.27   | 15.94±0.18                  | 14.84±0.54                   | 19.51±0.25                   | 12.70±0.33                 | 61.86±0.58                   |
| Quer          | 22.93±1.07   | 10.21±0.21                  | 7.10±0.27                    | 15.89±0.11                   | 5.06±0.13                  | 27.80±0.26                   |
| Apig          | 70.71±3.26   | 22.74±0.26                  | 13.86±0.49                   | 16.94±0.31                   | 16.09±0.35                 | 71.06±1.05                   |
| Nari          | 42.93±0.60   | 26.09±0.35                  | 19.73±0.14                   | 26.99±0.32                   | 18.48±0.17                 | 55.28±0.65                   |
| Kaem          | 10.09±0.62   | 6.07±0.09                   | 3.55±0.11                    | 6.83±0.04                    | 3.13±0.02                  | 13.16±0.20                   |
| Syri          | 0.95±0.01    | 0.51±0.01                   | 0.46±0.01                    | 1.09±0.01                    | 0.29±0.01                  | 1.06±0.02                    |
| Isor          | 17.99±0.94   | 8.50±0.08                   | 4.88±0.12                    | 12.3±0.29                    | 3.68±0.08                  | 22.66±0.10                   |
| Amentoflavone | 15.13±0.84   | 15.05±1.23                  | 23.83±0.80                   | 9.28±0.90                    | 12.97±0.39                 | 38.84±0.83                   |
| Bilobetin     | 427.87±10.04 | 360.79±13.00                | 531.09±16.55                 | 310.29±26.11                 | 277.84±7.71                | 451.09±9.79                  |
| Isoginkgetin  | 779.43±4.93  | 811.75±18.80                | 906.71±34.02                 | 693.92±21.09                 | 449.23±5.47                | 757.31±12.20<br>1020.85±18.3 |
| Ginkgetin     | 653.06±25.91 | 725.82±6.82<br>1167.38±98.0 | 801.96±17.43<br>1650.18±47.0 | 690.49±45.35<br>1114.62±50.2 | 542.89±9.49<br>841.88±74.9 | 7<br>1869.38±15.5            |
| Sciadopitysin | 834.58±81.07 | 2                           | 8                            | 5                            | 8                          | 3                            |

(Continued)

|                  | GL-9          | TCML-1      | TCML-2      | Taxi-1        | Taxi-2      | YZYX         |
|------------------|---------------|-------------|-------------|---------------|-------------|--------------|
| EGC              | 37.25±1.06    | 18.7±0.34   | 33.59±0.94  | 35.73±2.10    | 10.07±0.05  | 26.08±1.08   |
| HA               | 18.36±0.85    | 31.61±1.61  | 62.2±5.62   | 106.8±5.44    | 95.91±3.81  | 39.93±3.25   |
| Chlorogenic acid | 0.71±0.01     | 0.71±0.00   | 0.75±0.01   | 3.30±0.01     | 0.70±0.01   | 0.76±0.00    |
| Catechin         | 337.09±8.09   | 123.53±0.71 | 181.51±2.63 | 297.59±2.01   | 123.52±2.18 | 360.22±7.19  |
| CA               | 3.35±0.11     | 5.49±0.14   | 12.79±0.55  | 12.36±0.60    | 11.17±0.03  | 21.45±0.26   |
| Procyanidin B2   | 53.55±2.23    | 11.16±0.11  | 8.78±0.22   | 30.73±0.63    | 10.59±0.05  | 35.89±1.61   |
| EpiCatechin      | 135.72±3.25   | 42.96±0.88  | 37.03±1.08  | 92.83±0.26    | 38.22±0.39  | 118.49±9.45  |
| Dmyri            | 4.33±0.05     | 0.69±0.03   | 0.45±0.00   | 2.56±0.02     | 3.12±0.15   | 4.28±0.04    |
| p-coum           | 4.14±0.16     | 5.41±0.07   | 10.22±0.30  | 5.32±0.38     | 10.79±0.15  | 6.33±0.27    |
| Clitorin         | 189.91±4.32   | 342.05±6.72 | 5.45±0.22   | 156.18±1.53   | 73.32±0.60  | 200.98±5.46  |
| Rutin            | 1193.12±29.51 | 561.53±7.85 | 936.1±33.32 | 1105.06±30.28 | 845.62±6.42 | 1345.52±16.4 |
| Dquer            | 13.65±0.18    | 7.80±0.24   | 13.93±0.26  | 13.23±0.15    | 14.82±0.16  | 17.48±0.26   |

|               |               |              |               |              |              |               |
|---------------|---------------|--------------|---------------|--------------|--------------|---------------|
| Quer-3-G      | 87.07±2.32    | 78.01±1.32   | 64.36±1.84    | 98.18±3.28   | 42.32±0.53   | 98.40±2.66    |
| QGR           | 218.82±8.12   | 123.3±1.37   | 87.81±3.22    | 188.95±1.23  | 96.62±3.48   | 225.07±7.06   |
| Kaem-3-RU     | 555.82±9.40   | 459.88±5.38  | 975.32±5.28   | 620.88±22.64 | 521.92±15.34 | 803.74±21.94  |
| Isor-3-RU     | 421.35±18.34  | 326.57±5.54  | 892.12±16.34  | 464.57±1.98  | 253.1±2.29   | 816.56±12.11  |
| Quer-3-R      | 54.39±0.66    | 28.55±0.47   | 25.76±0.46    | 63.77±0.76   | 33.65±0.15   | 59.62±0.62    |
| Isor-3-G      | 19.4±0.46     | 28.13±0.81   | 20.43±0.36    | 27.37±0.86   | 13.16±0.18   | 26.57±0.93    |
| Kaem-7-G      | 11.78±0.46    | 4.44±0.07    | 4.35±0.25     | 12.83±0.83   | 3.22±0.11    | 16.08±0.46    |
| Apig-7-G      | 131.12±1.28   | 46.55±0.34   | 47.61±1.30    | 184±6.48     | 49.47±0.34   | 241.95±5.33   |
| Dkaem         | 114.55±0.32   | 30.93±0.56   | 57.68±0.89    | 101.62±0.39  | 139.94±1.34  | 158.07±1.43   |
| Myri          | 2.75±0.02     | 2.08±0.05    | 5.04±0.16     | 11.56±0.23   | 6.61±0.04    | 5.19±0.09     |
| QRCG          | 418.93±9.46   | 159.69±2.88  | 240.23±7.22   | 364.21±2.85  | 186.12±2.54  | 400.19±9.22   |
| KRCG          | 306.84±10.95  | 182.84±3.93  | 223.07±2.66   | 267.76±3.56  | 258.23±4.90  | 245.11±3.12   |
| Luteolin      | 11.10±0.22    | 10.41±0.22   | 49.98±1.12    | 21.41±1.70   | 28.01±0.13   | 38.71±0.73    |
| Quer          | 6.52±0.16     | 3.26±0.09    | 12.31±0.38    | 24.03±0.29   | 21.88±0.25   | 18.79±0.08    |
| Apig          | 11.85±0.35    | 8.85±0.12    | 26.50±0.91    | 39.53±0.69   | 42.04±0.33   | 51.28±0.13    |
| Nari          | 26.91±0.41    | 12.39±0.35   | 20.18±0.28    | 32.42±0.10   | 39.63±0.32   | 41.47±0.29    |
| Kaem          | 2.22±0.11     | 2.3±0.07     | 6.24±0.13     | 10.29±0.32   | 10.68±0.10   | 8.76±0.04     |
| Syri          | 0.19±0.00     | 0.28±0.01    | 0.71±0.00     | 1.41±0.02    | 1.73±0.04    | 0.63±0.01     |
| Isor          | 2.64±0.07     | 3.21±0.03    | 11.46±0.37    | 18.17±0.27   | 18.75±0.19   | 10.58±0.21    |
| Amentoflavone | 12.07±0.85    | 11.92±0.33   | 12.31±0.62    | 14.67±0.03   | 18.42±0.32   | 18.44±0.52    |
| Bilobetin     | 365.43±10.73  | 257.35±3.31  | 402.91±5.97   | 347.88±8.10  | 459.27±8.76  | 491.18±1.37   |
| Isoginkgetin  | 707.73±24.90  | 521.17±11.07 | 233.48±3.46   | 620.6±13.20  | 870.84±21.98 | 701.93±9.38   |
| Ginkgetin     | 708.57±35.01  | 528.11±13.09 | 1462.71±57.18 | 567.84±5.62  | 805.09±30.53 | 813.06±26.15  |
| Sciadopitysin | 1017.69±55.07 | 964.67±68.50 | 745.36±36.34  | 671.52±9.80  | 1435.48±27.3 | 1698.12±19.39 |
